# Supplementary material for: Superior Colliculus to VTA pathway controls orienting response and influences social interaction in mice
Source: PubMed Central journal article supplement (PMC8831635; doi:10.1038/s41467-022-28512-4), 2022-02-10
Supplement: 41467_2022_28512_MOESM1_ESM.pdf [file 41467_2022_28512_MOESM1_ESM.pdf]

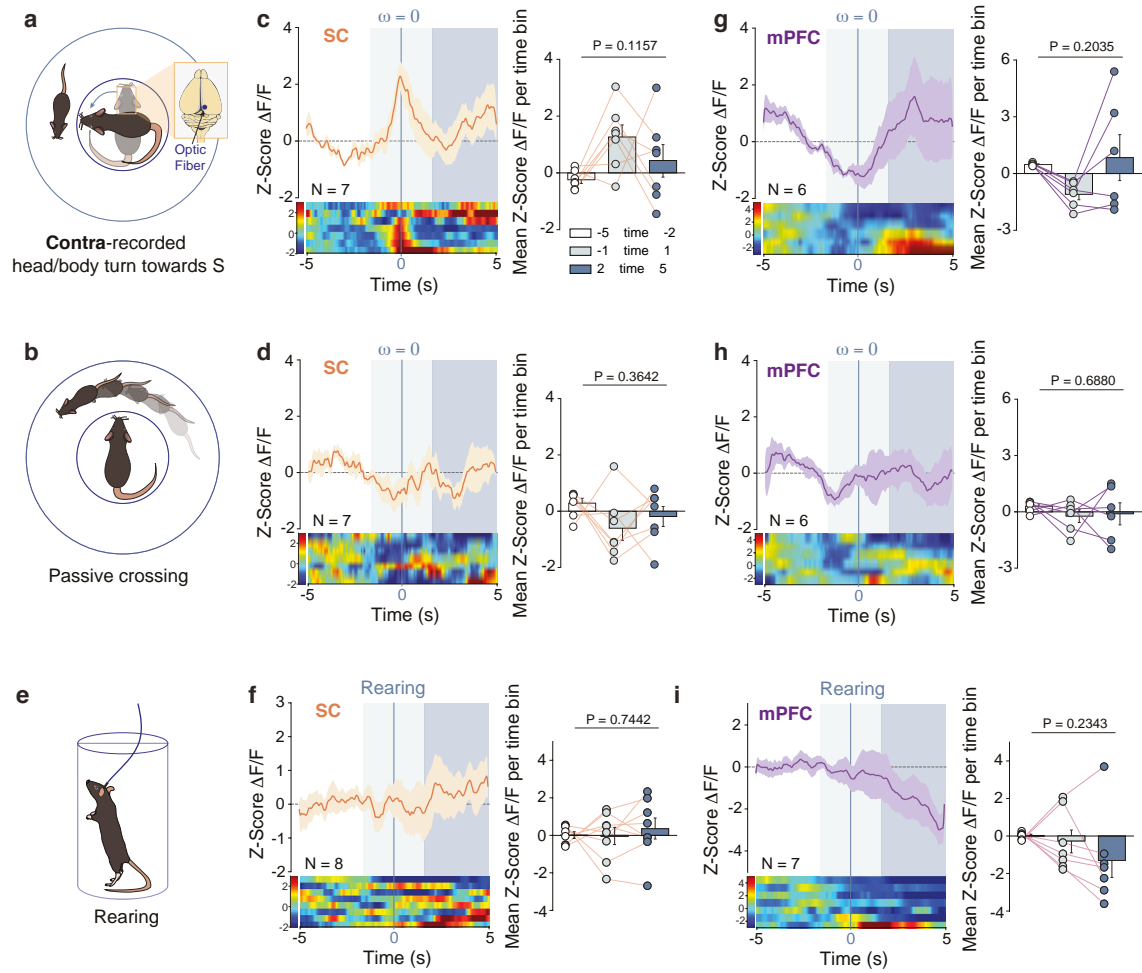

Sup. Figure 1 - Solié, Contestabile et al

**Supplementary figure 1: Calcium activity of SC or mPFC to VTA projecting neurons during social orientation test.**

**(a, b and e)** Time locked events observed during social orientation test. **(c)** Left panel: Peri-event time histogram (PETH) of normalized  $\Delta F/F$  for SC-VTA projecting neurons, centered on contra-recorded orientation. Right panel: Mean  $\Delta F/F$  (Z-score) before, during and after contra-recorded orientation towards social stimulus. RM one-way ANOVA (Events main effect:  $F_{(2,6)} = 2.59$ ,  $P = 0.1157$ ). **(d)** Left panel: PETH of normalized  $\Delta F/F$  for SC-VTA projecting neurons, centered on passive crossing. Right panel: Mean  $\Delta F/F$  (Z-score) before, during and after passive crossing. RM one-way ANOVA (Events main effect:  $F_{(2,6)} = 1.1002$ ,  $P = 0.3642$ ). **(f)** Left panel: PETH of normalized  $\Delta F/F$  for SC-VTA projecting neurons, centered on rearing behaviour. Right panel: Mean calcium activity (Z-score) before, during and after rearing. RM one-way ANOVA (Events main effect:  $F_{(2,7)} = 0.3017$ ,  $P = 0.7442$ ). **(g)** Left panel: PETH of normalized  $\Delta F/F$  for mPFC-VTA projecting neurons, centered on contra-recorded orientation towards social stimulus. Right panel: Mean  $\Delta F/F$  (Z-score) before, during and after contra-recorded orientation. RM one-way ANOVA (Events main effect:  $F_{(2,5)} = 1.87$ ,  $P = 0.2035$ ). **(h)** Left panel: PETH of normalized  $\Delta F/F$  for mPFC-VTA projecting neurons, centered on passive crossing. Right panel: Mean  $\Delta F/F$  (Z-score) before, during and after passive crossing. RM one-way ANOVA (Events main effect:  $F_{(2,5)} = 0.39$ ,  $P = 0.6880$ ). **(i)** Left panel: PETH of normalized  $\Delta F/F$  for mPFC-VTA projecting neurons, centered on rearing behaviour. Right panel: Mean calcium activity (Z-score) before, during and after rearing. RM one-way ANOVA (Events main effect:  $F_{(2,6)} = 1.6417$ ,  $P = 0.2343$ ). N indicates the number of mice. All the data are shown as the mean  $\pm$  s.e.m. as error bars or error bands. Source data are provided as a Source Data file.

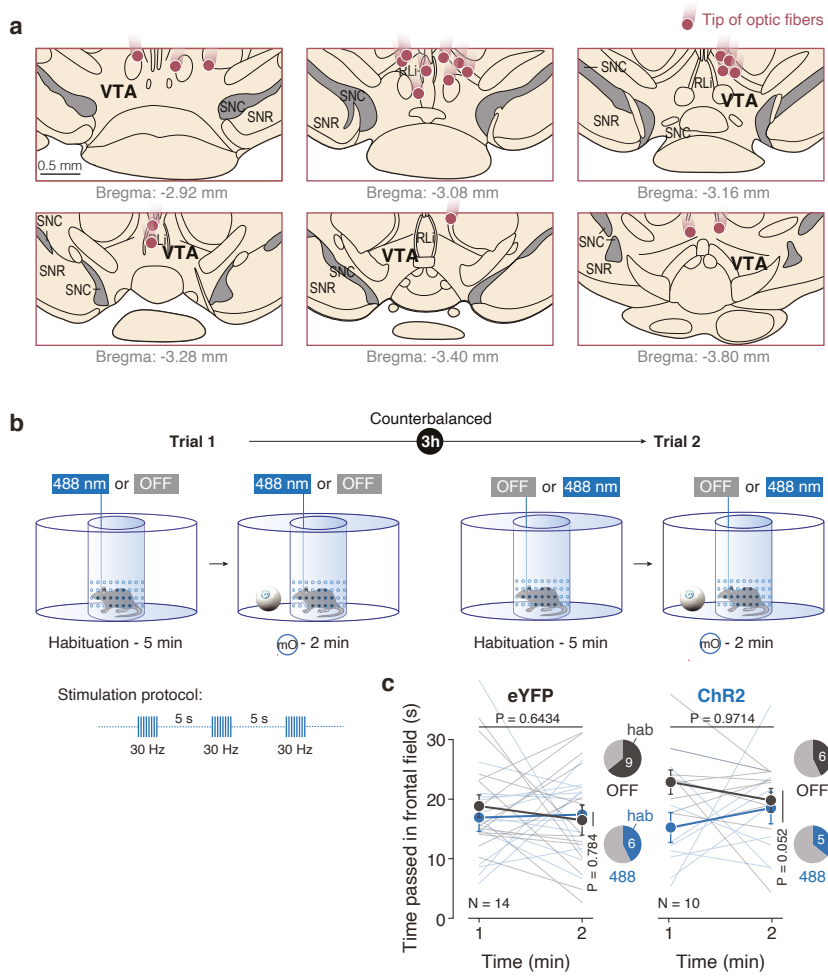

Sup. Figure 2 - Solié, Contestabile et al

**Supplementary figure 2: Optogenetic manipulation of SC-VTA pathway alters orientation towards moving non-social stimuli.**

**(a)** Examples of optic fibers' tips localization after post-hoc validation. **(b)** Top panel: Schema of the social orientation test. The eYFP- and ChR2-expressing mice oriented towards a moving ball (mO) during both stimulation conditions. Bottom panel: Stimulation protocol. 8 pulses of 488 nm light (30 Hz) were separated by 5s in the light ON condition. **(c)** Time passed with the social stimulus in the frontal field for the 1<sup>st</sup> and 2<sup>nd</sup> minute of the orienting test in light and no-light conditions. RM two-way ANOVA (eYFP<sup>488 nm</sup>: Light main effect:  $F_{(1,13)} = 0.0782$ ,  $P = 0.7842$ ; Time main effect:  $F_{(1,13)} = 0.2247$ ,  $P = 0.6434$ ; Light x Time Interaction:  $F_{(1,13)} = 0.3365$ ,  $P = 0.5718$ . ChR2<sup>488 nm</sup>: Light main effect:  $F_{(1,9)} = 4.984$ ,  $P = 0.0525$ ; Time main effect:  $F_{(1,9)} = 0.001$ ,  $P = 0.9714$ ; Light x Time Interaction:  $F_{(1,9)} = 3.252$ ,  $P = 0.1049$ ). Pie charts represent the percentage of mice that decrease the orientation towards the moving ball between 1<sup>st</sup> and 2<sup>nd</sup> minute. N indicates the number of mice. All the data are shown as the mean +/- s.e.m. as error bars. Source data are provided as a Source Data file.

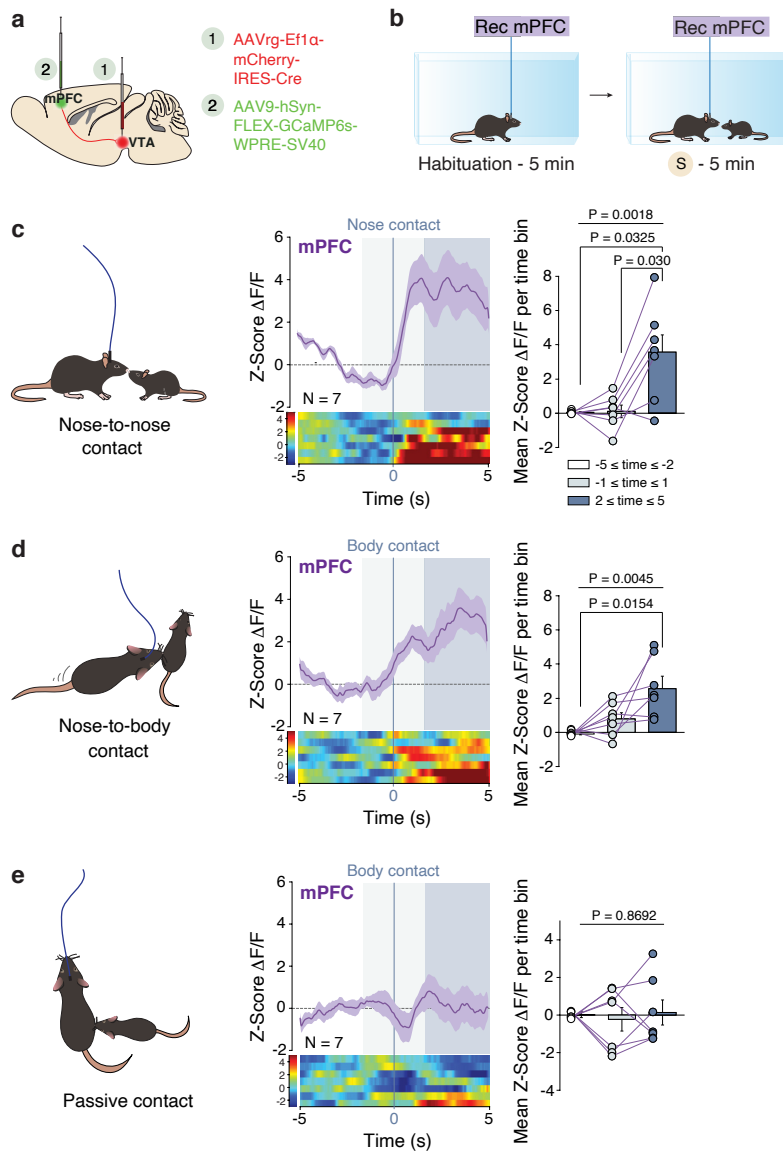

Sup. Figure 3 - Solié, Contestabile et al

**Supplementary figure 3: Calcium activity of mPFC to VTA projecting neurons during free social interaction.**

**(a)** Schema of injections of AAVrg-Ef1 $\alpha$ -mCherry-IRES-Cre in the VTA and AAV9-hSyn-FLEX-GCaMP6s-WPRE-SV40 in the mPFC. **(b)** Schema of free social interaction test. **(c)** Left panel: PETH of normalized  $\Delta F/F$  for mPFC-VTA projecting neurons, centered on nose-to-nose contacts. Right panel: Mean  $\Delta F/F$  (Z-score) before, during and after nose-to-nose. RM one-way ANOVA (Events main effect:  $F_{(2,6)} = 11.28$ ,  $P = 0.0018$ ) followed by Bonferroni-Holm post-hoc test correction. **(d)** Left panel: PETH of normalized  $\Delta F/F$  for mPFC-VTA projecting neurons, centered on nose-to-body contacts. Right panel: Mean  $\Delta F/F$  (Z-score) before, during and after nose-to-body. RM one-way ANOVA (Events main effect:  $F_{(2,6)} = 8.79$ ,  $P = 0.0045$ ) followed by Bonferroni-Holm post-hoc test correction. **(e)** Left panel: PETH of normalized  $\Delta F/F$  for mPFC-VTA projecting neurons, centered on passive contacts. Right panel: Mean  $\Delta F/F$  (Z-score) before, during and after passive. RM one-way ANOVA (Events main effect:  $F_{(2,6)} = 0.14$ ,  $P = 0.8692$ ). N indicates the number of mice. All the data are shown as the mean  $\pm$  s.e.m. as error bars or error bands. Source data are provided as a Source Data file.

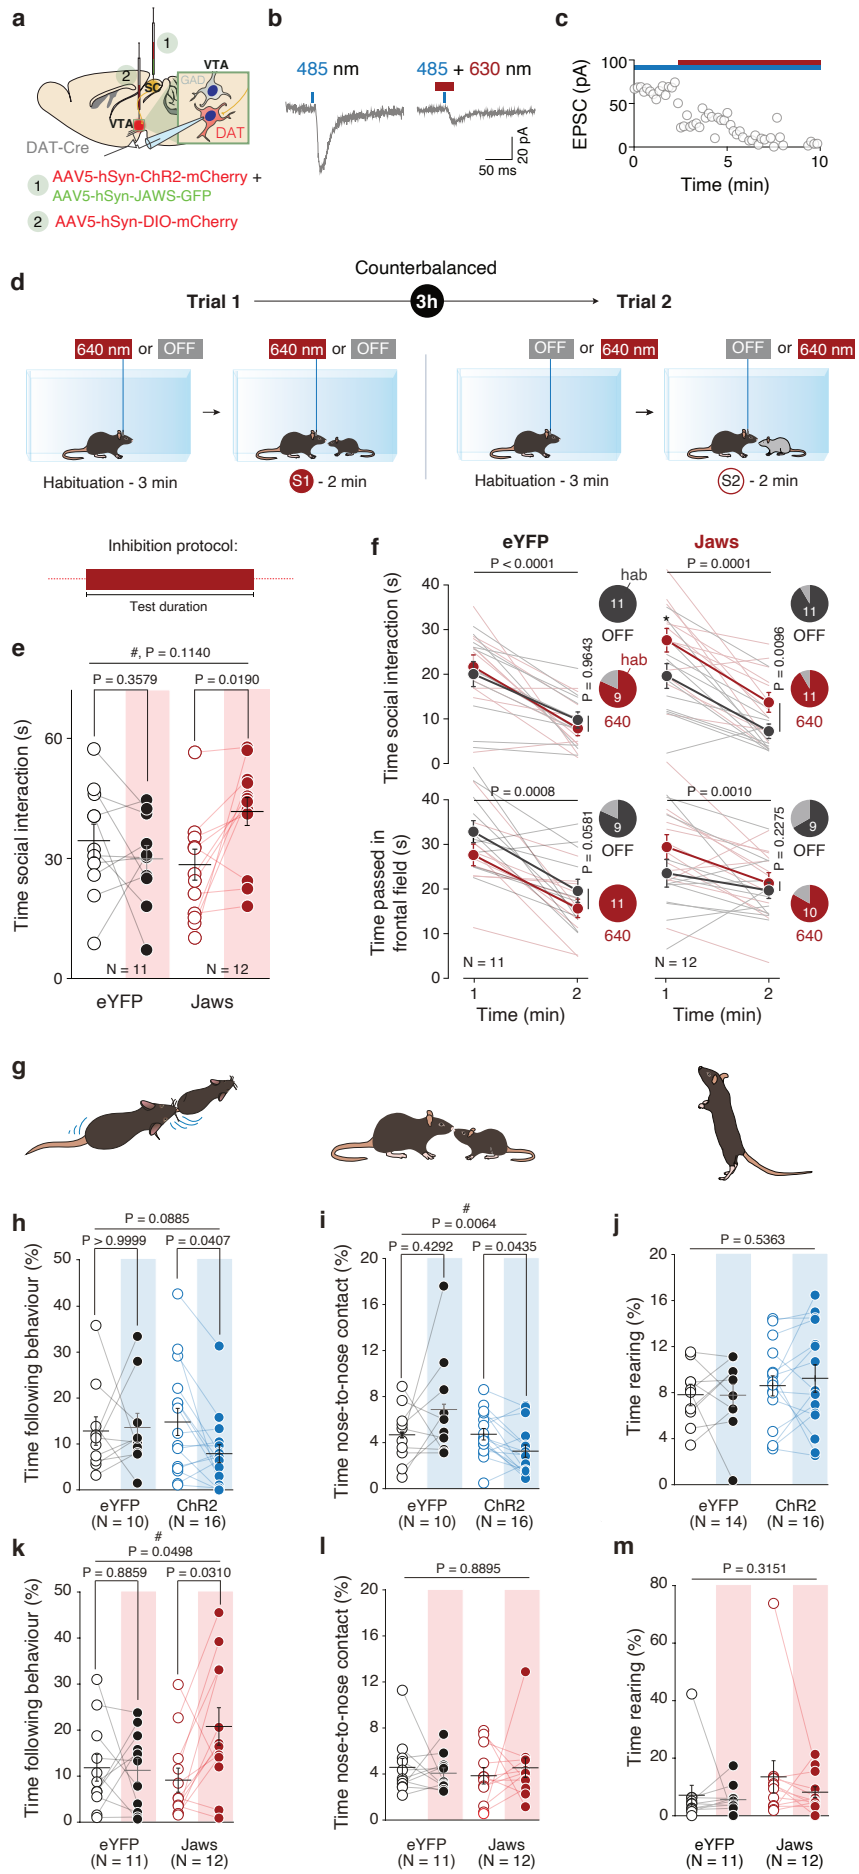

Sup. Figure 4 - Solié, Contestabile et al

**Supplementary figure 4: Optogenetic inhibition of SC-VTA pathway alters social interaction and orientating responses.**

**(a)** Schema of injections in the SC with AAV5-hSyn-ChR2-mCherry + AAV5-hSyn-JAWS-GFP and with AAV5-hSyn-DIO-mCherry in the VTA. **(b)** Example traces of evoked EPSCs after photostimulation (left) and photostimulation followed by photoinhibition (right). **(c)** Amplitude of evoked EPSCs in function of the time. Photostimulation is indicated in blue and photoinhibition in red. The graph shows an induced EPSC in the VTA DAT<sup>+</sup> neurons when the blue light only is shined. However, with contingent shining of blue and red lights, the current approach to 0 confirming a terminal inhibition from the SC onto VTA DAT<sup>+</sup> neurons. **(d)** Top panel: Schema of free social interaction. The eYFP- and Jaws-expressing mice freely interacted with two different unfamiliar mice under both stimulation conditions. Bottom panel. Inhibition protocols. Continuous inhibition was provoked with 640 nm light. **(e)** Time social interaction during the free social interaction test for eYFP- and Jaws-expressing mice in the SC. RM two-way ANOVA (Light main effect:  $F_{(1,21)} = 2.7201$ ,  $P = 0.1140$ ; Virus main effect:  $F_{(1,21)} = 0.1985$ ,  $P = 0.6605$ ; Light x Virus Interaction:  $F_{(1,21)} = 8.3378$ ,  $P = 0.0088$ ) followed by Bonferroni-Holm post-hoc test correction. **(f)** Upper panels: time passed interacting with the social stimulus for the 1<sup>st</sup> and 2<sup>nd</sup> minute of the free social interaction test in light and no-light conditions. RM two-way ANOVA (eYFP: Light main effect:  $F_{(1,10)} = 0.002$ ,  $P = 0.9643$ ; Time main effect:  $F_{(1,10)} = 49.49$ ,  $P < 0.0001$ ; Light x Time Interaction:  $F_{(1,10)} = 0.7046$ ,  $P = 0.4209$ . Jaws: Light main effect:  $F_{(1,11)} = 9.803$ ,  $P = 0.0096$ ; Time main effect:  $F_{(1,11)} = 33.08$ ,  $P = 0.0001$ ; Light x Time Interaction:  $F_{(1,11)} = 0.1984$ ,  $P = 0.6646$ ) followed by Bonferroni's multiple comparisons post-hoc test. Lower panels: time passed with the social stimulus in the frontal field for the 1<sup>st</sup> and 2<sup>nd</sup> minute of the free social interaction test in light and no-light conditions. RM two-way ANOVA (eYFP: Light main effect:  $F_{(1,10)} = 4.576$ ,  $P = 0.0581$ ; Time main effect:  $F_{(1,10)} = 22.69$ ,  $P = 0.0008$ ; Light x Time Interaction:  $F_{(1,10)} = 0.1177$ ,  $P = 0.7386$ . Jaws: Light main effect:  $F_{(1,11)} = 1.634$ ,  $P = 0.2275$ ; Time main effect:  $F_{(1,11)} = 19.89$ ,  $P = 0.0010$ ; Light x Time Interaction:  $F_{(1,11)} = 0.8598$ ,  $P = 0.3737$ ) followed by Bonferroni's multiple comparisons post-hoc test. Pie charts represent the percentage of mouse that decreases the interaction/orientation between 1<sup>st</sup> and 2<sup>nd</sup> minute. **(g)** Schema of a mouse performing following behaviour (left), nose-to-nose (center) or



rearing (right). **(h)** Time of following behaviour for SC eYFP and ChR2-expressing mice under light-ON and light-OFF epochs. RM two-way ANOVA (Light main effect:  $F_{(1,24)} = 3.1522$ ,  $P = 0.0885$ ; Virus main effect:  $F_{(1,24)} = 0.3289$ ,  $P = 0.5716$ ; Interaction Light x Virus:  $F_{(1,24)} = 2.7778$ ,  $P = 0.1086$ ) followed by Bonferroni-Holm post-hoc test correction. **(i)** Time of nose-to-nose contact for SC eYFP and ChR2-expressing mice under light-ON and light-OFF epochs. RM two-way ANOVA (Light main effect:  $F_{(1,24)} = 0.0064$ ,  $P = 0.9370$ ; Virus main effect:  $F_{(1,24)} = 4.3794$ ,  $P = 0.0471$ ; Interaction Light x Virus:  $F_{(1,24)} = 6.4369$ ,  $P = 0.0181$ ) followed by Bonferroni-Holm post-hoc test correction. **(j)** Time of rearing behaviour during free social interaction test for SC eYFP and ChR2-expressing mice under light-ON and light-OFF epochs. RM two-way ANOVA (Light main effect:  $F_{(1,28)} = 0.3921$ ,  $P = 0.5363$ ; Virus main effect:  $F_{(1,28)} = 1.3238$ ,  $P = 0.2596$ ; Interaction Light x Virus:  $F_{(1,28)} = 0.5985$ ,  $P = 0.4456$ ). **(k)** Time of following behavior for SC eYFP and Jaws-expressing mice under light-ON and light-OFF epochs. RM two-way ANOVA (Light main effect:  $F_{(1,21)} = 4.3333$ ,  $P = 0.0498$ ; Virus main effect:  $F_{(1,21)} = 0.9925$ ,  $P = 0.3305$ ; Interaction Light x Virus:  $F_{(1,21)} = 4.7701$ ,  $P = 0.0404$ ) followed by Bonferroni-Holm post-hoc test correction. **(l)** Time of nose-to-nose contact for SC eYFP and Jaws-expressing mice under light-ON and light-OFF epochs. RM two-way ANOVA (Light main effect:  $F_{(1,21)} = 0.0198$ ,  $P = 0.8895$ ; Virus main effect:  $F_{(1,21)} = 0.0476$ ,  $P = 0.8294$ ; Interaction Light x Virus:  $F_{(1,21)} = 0.5243$ ,  $P = 0.4770$ ). **(m)** Time of rearing behaviour during free social interaction test for SC eYFP and Jaws-expressing mice under light-ON and light-OFF epochs. RM two-way ANOVA (Light main effect:  $F_{(1,21)} = 1.0594$ ,  $P = 0.3151$ ; Virus main effect:  $F_{(1,21)} = 1.3808$ ,  $P = 0.2531$ ; Interaction Light x Virus:  $F_{(1,21)} = 0.3329$ ,  $P = 0.5701$ ). # Indicates significant interaction. N indicates the number of mice. All the data are shown as the mean +/- s.e.m. as error bars. Source data are provided as a Source Data file.

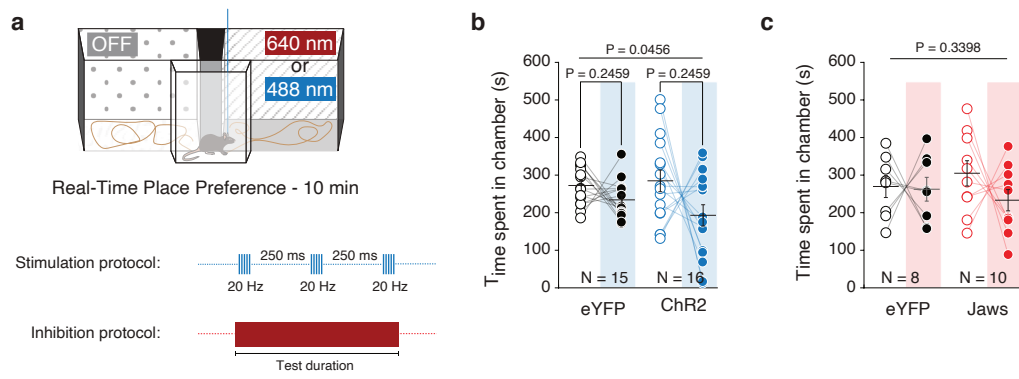

Sup. Figure 5 - Solié, Contestabile et al

**Supplementary figure 5: SC-VTA pathway stimulation or inhibition does not induce place preference**

**(a)** Schema of the real-time place preference set up. The optogenetic stimulation/inhibition is assigned to one chamber while the other one is not associated with any stimulation. The mice are free to explore the apparatus during 10 mins. **(b)** Time spent in the chamber associated with the photostimulation or not for eYFP and ChR2 mice. RM two-way ANOVA (Light main effect:  $F_{(1,29)} = 4.3617$ ,  $P = 0.0456$ ; Virus main effect:  $F_{(1,29)} = 5.2176$ ,  $P = 0.0299$ ; Light x Virus Interaction:  $F_{(1,29)} = 0.7305$ ,  $P = 0.3997$ ) followed by Bonferroni-Holm post-hoc test correction. **(c)** Time spent in the chamber associated with the photoinhibition or not for eYFP and Jaws mice. RM two-way ANOVA (Light main effect:  $F_{(1,16)} = 0.9683$ ,  $P = 0.3398$ ; Virus main effect:  $F_{(1,16)} = 0.2699$ ,  $P = 0.6105$ ; Light x Virus Interaction:  $F_{(1,16)} = 0.5421$ ,  $P = 0.4722$ ). N indicates the number of mice. All the data are shown as the mean +/- s.e.m. as error bars. Source data are provided as a Source Data file.

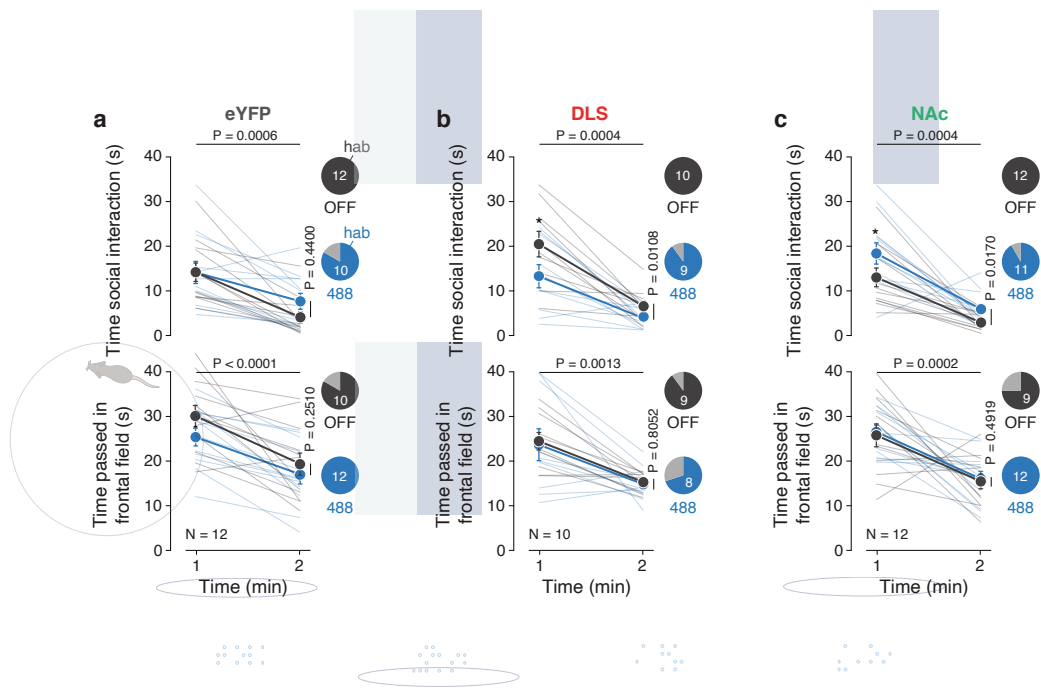

Sup. Figure 6 - Solié, Contestabile et al

**Supplementary figure 6: Optogenetic stimulation of VTA-DLS or VTA-NAc pathways do not perturb head orientation towards conspecific.**

**(a, b and c)** Upper panels: time passed interacting with the social stimulus for the 1<sup>st</sup> and 2<sup>nd</sup> minute of the free social interaction test in light and no-light conditions. RM two-way ANOVA (eYFP: Light main effect:  $F_{(1,11)} = 0.6419$ ,  $P = 0.4400$ ; Time main effect:  $F_{(1,11)} = 22.40$ ,  $P = 0.0006$ ; Light x Time Interaction:  $F_{(1,11)} = 2.799$ ,  $P = 0.1225$ . ChR2<sup>DLS</sup>: Light main effect:  $F_{(1,9)} = 10.26$ ,  $P = 0.0108$ ; Time main effect:  $F_{(1,9)} = 29.19$ ,  $P = 0.0004$ ; Light x Time Interaction:  $F_{(1,9)} = 2.259$ ,  $P = 0.1671$ . ChR2<sup>NAc</sup>: Light main effect:  $F_{(1,11)} = 7.882$ ,  $P = 0.0170$ ; Time main effect:  $F_{(1,11)} = 24.51$ ,  $P = 0.0004$ ; Light x Time Interaction:  $F_{(1,11)} = 1.261$ ,  $P = 0.2854$ ) followed by Bonferroni's multiple comparisons post-hoc test. Lower panels: time passed with the social stimulus in the frontal field for the 1<sup>st</sup> and 2<sup>nd</sup> minute of the free social interaction test in light and no-light conditions. RM two-way ANOVA (eYFP: Light main effect:  $F_{(1,11)} = 1.469$ ,  $P = 0.2510$ ; Time main effect:  $F_{(1,11)} = 37.84$ ,  $P < 0.0001$ ; Light x Time Interaction:  $F_{(1,11)} = 0.3936$ ,  $P = 0.5432$ . ChR2<sup>DLS</sup>: Light main effect:  $F_{(1,9)} = 0.0645$ ,  $P = 0.8052$ ; Time main effect:  $F_{(1,9)} = 21.34$ ,  $P = 0.0013$ ; Light x Time Interaction:  $F_{(1,9)} = 0.006$ ,  $P = 0.9388$ . ChR2<sup>NAc</sup>: Light main effect:  $F_{(1,11)} = 0.5055$ ,  $P = 0.4919$ ; Time main effect:  $F_{(1,11)} = 29.27$ ,  $P = 0.0002$ ; Light x Time Interaction:  $F_{(1,11)} = 0.0011$ ,  $P = 0.9742$ ) followed by Bonferroni's multiple comparisons post-hoc test. Pie charts represent the percentage of mouse that decreases the interaction/orientation between 1<sup>st</sup> and 2<sup>nd</sup> minute. N indicates the number of mice. All the data are shown as the mean +/- s.e.m. as error bars. Source data are provided as a Source Data file.
